# Supplementary material for: Methylated naphthalene additives with various melting and boiling points enable a win–win scenario of optimizing both cost and efficiency of polymer solar cells
Source: Royal Society of Chemistry journal article supplement (doi:10.1039/d4ta07309f), 2025-01-01
Supplement: d4ta07309f1.pdf [file d4ta07309f1.pdf]

## Supporting Information

### **Methylated naphthalene additives with various melting and boiling points enable a win-win scenario of optimizing both cost and efficiency of polymer solar cells**

Tao Li <sup>a</sup>, Xiaoying Zhang <sup>a</sup>, Qi Chen <sup>b</sup>, Zhi-Guo Zhang <sup>b</sup>, Ping Shen <sup>\*a,c</sup>, Chao Weng <sup>\*a</sup>

<sup>a</sup> Key Laboratory for Green Organic Synthesis and Application of Hunan Province, Key Laboratory of Environmentally Friendly Chemistry and Application of Ministry of Education, College of Chemistry, Xiangtan University, Xiangtan 411105, China.

<sup>b</sup> State Key Laboratory of Chemical Resource Engineering Beijing Advanced Innovation Center for Soft Matter Science and Engineering, Beijing University of Chemical Technology, Beijing 100029, China.

<sup>c</sup> Key Laboratory of Organic Synthesis of Jiangsu Province, College of Chemistry, Chemical Engineering and Materials Science, Soochow University, Suzhou, 215123, China.

\*Corresponding author: E-mail: wengc2013@163.com (C. Weng);

shenping802002@xtu.edu.cn (P. Shen); zgzhangwhu@iccas.ac.cn (Z.-G. Zhang)

#### **1. Analytical Instruments**

Ultraviolet-visible (UV-vis) absorption spectra were measured on Agilent Cary60 spectrometer. The photoluminescence (PL) spectrum was conducted on an HORIBA Instrument QM40. Thermal gravimetric analysis (TGA) was performed under nitrogen at a heating rate of 5 °C min<sup>-1</sup> with TGA Q50 analyzer. The morphologies of the four blend films were characterized by atomic force microscopy (AFM, Multimode 8 with a tapping mode). Grazing incidence wide angle X-ray scattering (GIWAXS) was performed at 1W1A Diffuse X-ray Scattering Station, Beijing Synchrotron Radiation Facility (BSRF-1W1A), China. The samples were prepared in silicon substrates using identical blend solutions and conditions as those used in device fabrication. The solution of each pure organic material was spin-coated on cleaned ITO substrates. Droplets of two

different liquids, water and ethylene glycol (EG) were cast onto the pure organic films with the drop size kept at 1  $\mu\text{L}$  per drop. Contact angle images were taken at 4 s after the whole droplet was deposited onto the sample surface. At least 3 independent measurements were performed for each single liquid.

## 2. Measurement of hole and electron mobilities

The charge carrier mobilities of the binary active layers were measured by using the space-charge-limited current (SCLC) method. Hole-only devices with a structure of ITO/PEDOT:PSS/active layer/MoO<sub>3</sub>/Ag and electron-only devices with a structure of ITO/ZnO/active layer/PFN-Br/Ag were fabricated. The device characteristics were extracted by modeling the dark current under forward bias using the SCLC expression described by the Mott-Gurney law:

$$J = \frac{9}{8} \varepsilon_r \varepsilon_0 \mu \frac{V^2}{L^3}$$

Here,  $\varepsilon_r \approx 3$  is the average dielectric constant of blend film,  $\varepsilon_0$  is the permittivity of the free space,  $\mu$  is the carrier mobility,  $L$  is the thickness of active layers, and  $V$  is the applied voltage.

## 3. Charge transport, exciton dissociation, and charge collection properties

$V_{\text{OC}}$  and  $P_{\text{light}}$  follow the relationship:  $V_{\text{OC}} \propto nK_{\text{B}}T/q \ln(P_{\text{light}})$ , the value of  $n$  determines the main charge recombination type of PSCs.  $J_{\text{SC}}$  and  $P_{\text{light}}$  satisfy the equation:  $J_{\text{SC}} \propto P_{\text{light}}^{\alpha}$ , the value of  $\alpha$  reflects the strength of bimolecular recombination.  $J_{\text{ph}}$  satisfies the equation:  $J_{\text{ph}} = J_{\text{L}} - J_{\text{D}}$ ,  $V_{\text{eff}}$  can be defined as  $V_{\text{eff}} = V_0 - V_{\text{appl}}$  ( $J_{\text{L}}$  and  $J_{\text{D}}$  stand for the current density in bright and dark environments,  $V_0$  represents the voltage when the  $J_{\text{ph}}$  is equal to zero, and the  $V_{\text{appl}}$  refers to the voltage applied to the device). The exciton dissociation probability ( $P(E, T)$ ) can be acquired from the  $J_{\text{ph}} - V_{\text{eff}}$  curves, and the value of  $J_{\text{ph}}/J_{\text{sat}}$  determines the  $P(E, T)$ . The charge collection efficiency ( $P_{\text{Coll}}$ ) value is determined by the value  $J_{\text{max}}/J_{\text{sat}}$  ( $J_{\text{max}}$  is the current density when the device is under the condition of the maximum output power).

## 4. Supplementary Figures

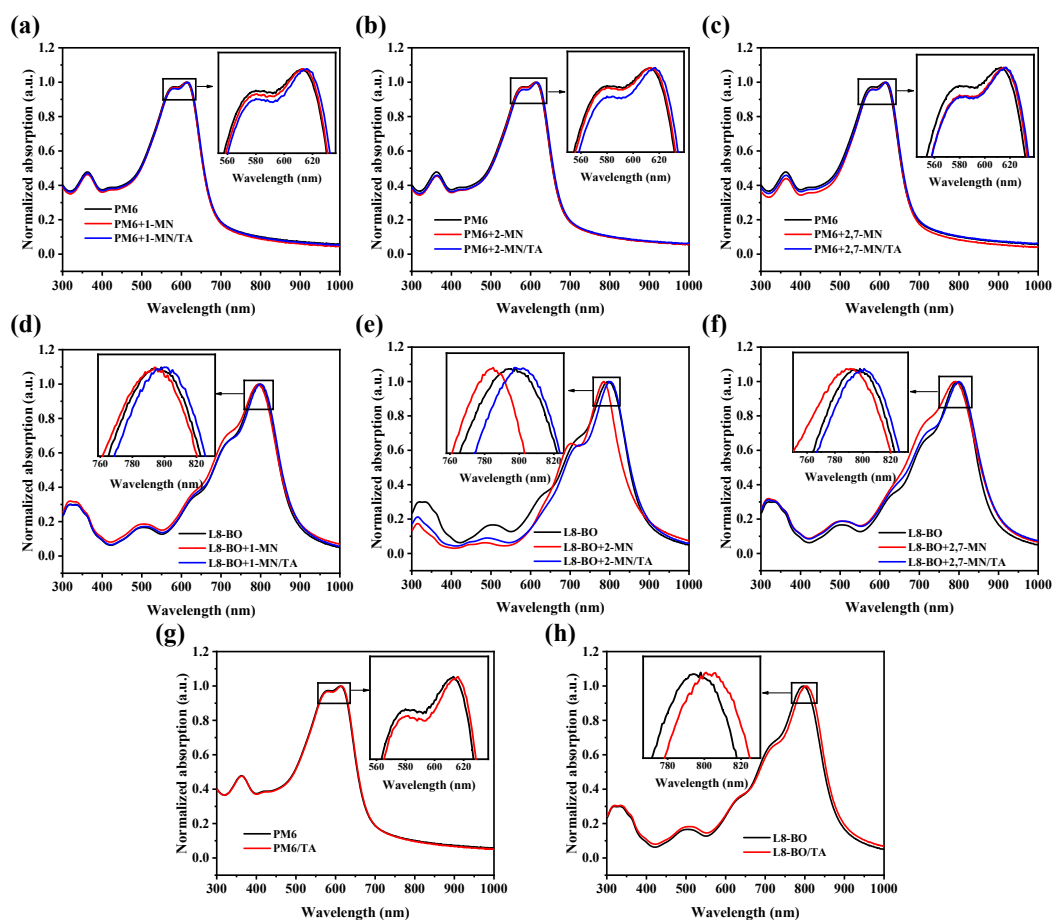

**Fig. S1.** UV-vis absorption spectra of PM6 film and L8-BO film under different conditions.

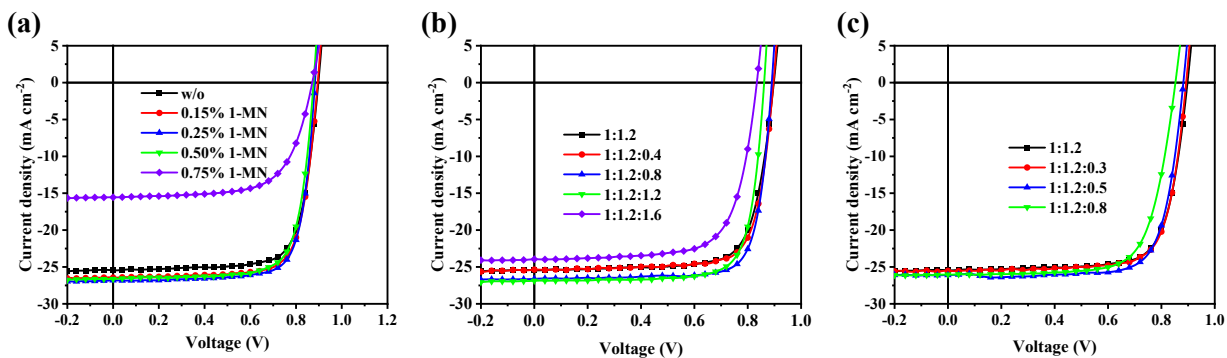

**Fig. S2.** The  $J$ - $V$  curves of the device processed with different additive ratio: (a) 1-MN ratios, (b) 2-MN ratios, and (c) 2,7-MN ratios.

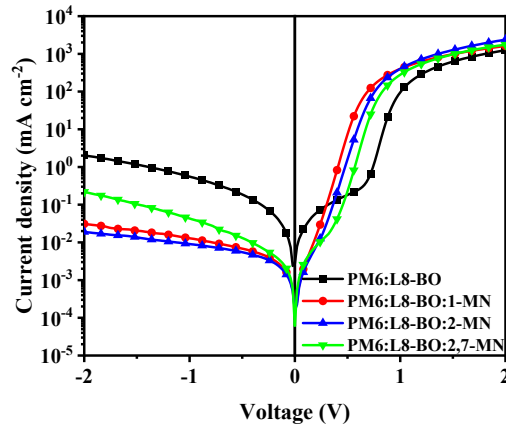

**Fig. S3.** The dark current curves of the device under different conditions.

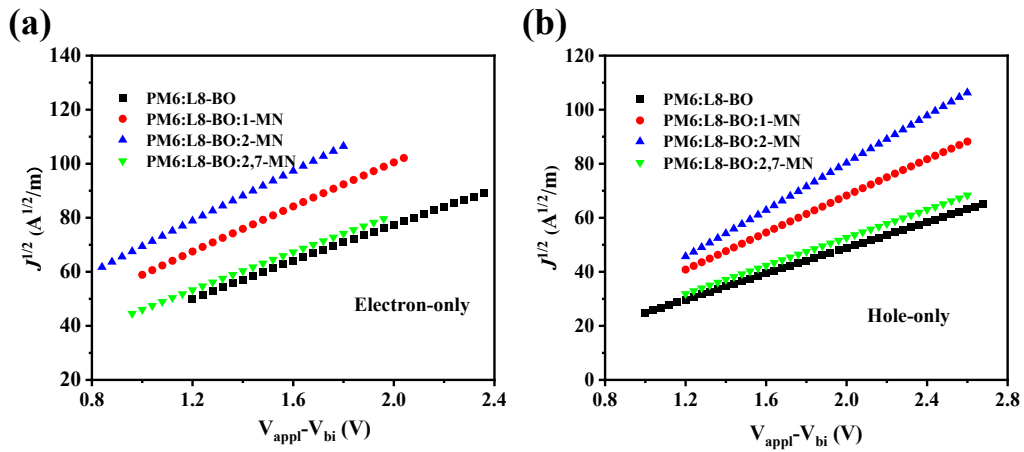

**Fig. S4.** (a)  $\mu_e$  and (b)  $\mu_h$  of the device processed without/with different additives.

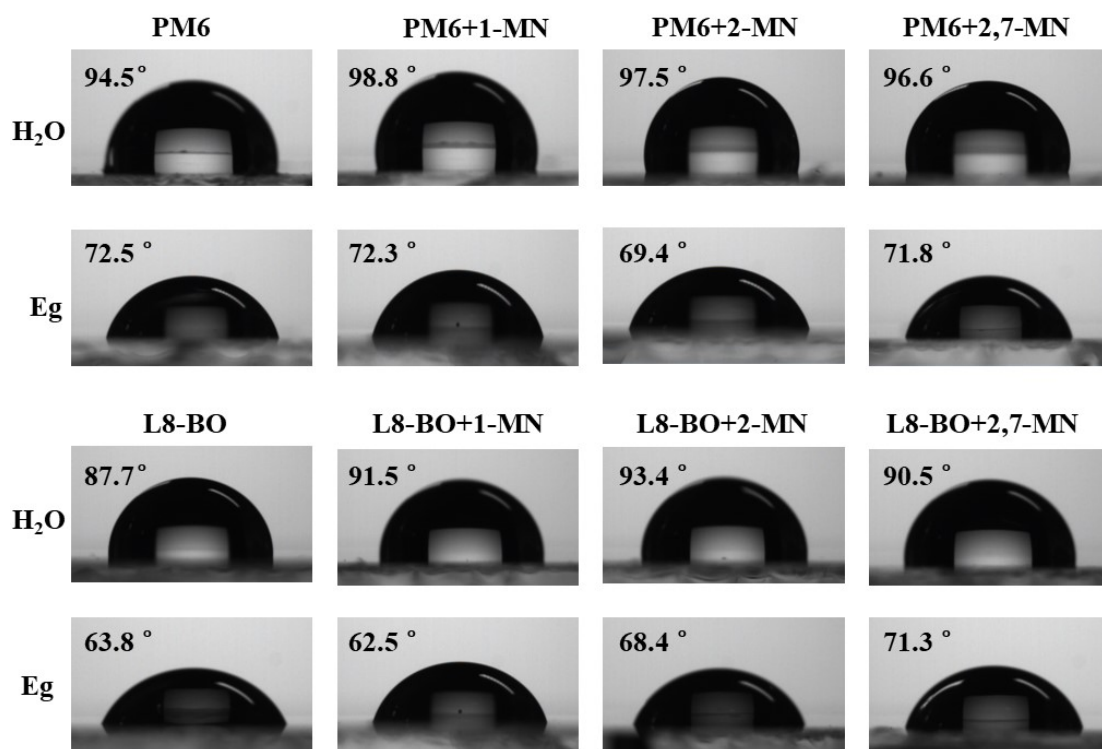

Fig. S5. Contact angles of PM6 and L8-BO films under different conditions.

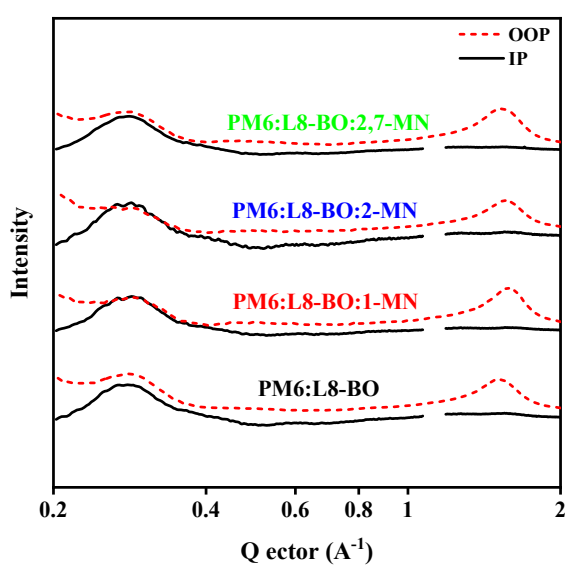

Fig. S6. The OOP and IP line cuts from 2D GIWAXS patterns.

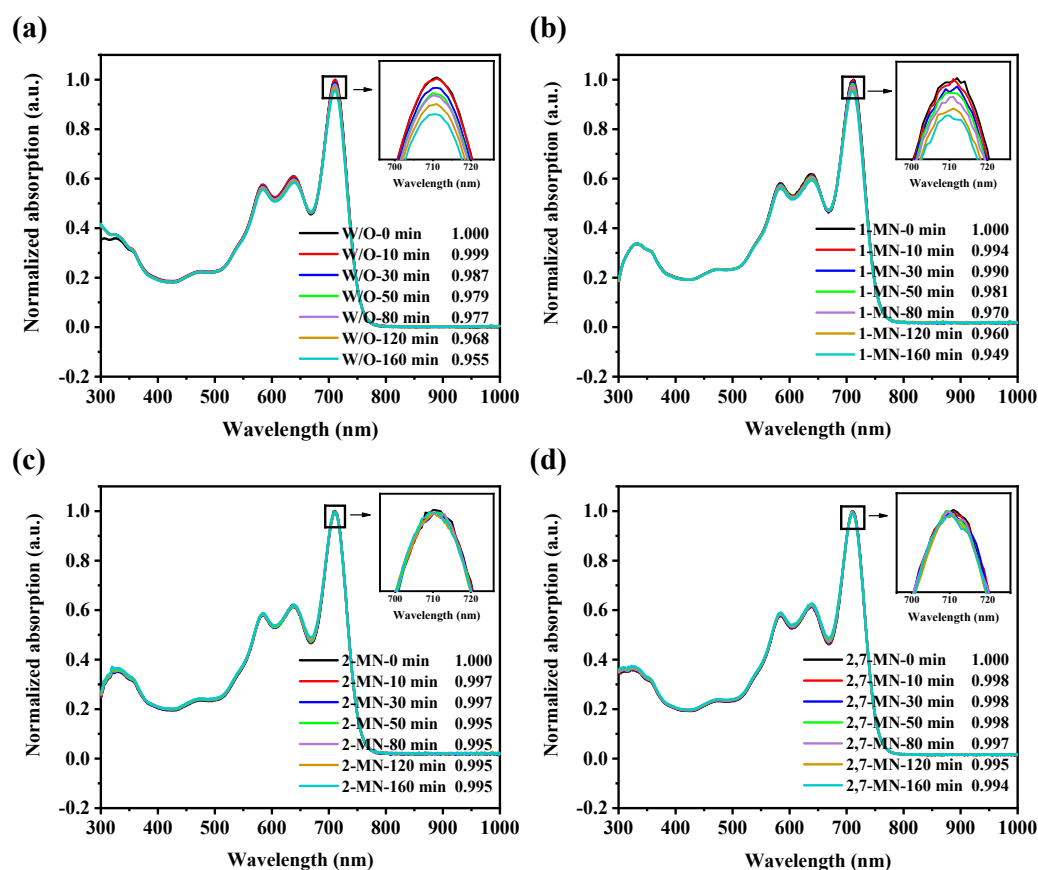

**Fig. S7.** UV-vis absorption spectra of the PM6/L8-BO blend solution under different conditions.

## 5. Supplemental Tables

**Table S1.** The prices of some reported non-halogenated volatile solid additives and corresponding FF and PCE of PSCs.

| Additives | Price<br>(from Energy<br>Chemical) | FF<br>[%] | PCE [%] | System                | Ref. |
|-----------|------------------------------------|-----------|---------|-----------------------|------|
| NA        | ¥ 20/100g                          | 78.42     | 16.52   | PM6:Y6                | [1]  |
| 2-MON     | ¥ 25/25g                           | 76.40     | 17.32   | PM6:PY-DT             | [2]  |
| DMON      | ¥ 774/25g                          | 59.30     | 11.19   | PBDB-T:TTC8-<br>O1-4F | [3]  |

|       |          |       |       |                          |           |
|-------|----------|-------|-------|--------------------------|-----------|
| BDT   | ¥4760/5g | 77.11 | 17.91 | PM6:Y6                   | [4]       |
| Ph    | ¥451/25g | 77.82 | 18.47 | D18-Cl:N3                | [5]       |
| DBT   | ¥62/25g  | 79.33 | 18.87 | PM6:L8-BO                | [6]       |
| 9-FL  | ¥25/25g  | 79.00 | 18.60 | PM6:BTP-eC9              | [7]       |
| TT    | ¥720/25g | 75.10 | 17.75 | PM6:Y6                   | [8]       |
| DTT-3 | ¥2159/5g | 73.60 | 14.82 | PM6:L15                  | [9]       |
| DOB   | ¥22/25g  | 75.60 | 17.05 | PM6:L8-BO                | [10]      |
| TMB   | ¥31/25g  | 79.95 | 18.61 | PBDB-TF:eC9              | [11]      |
| BPO   | ¥20/25g  | 70.70 | 8.03  | PTB7:PC <sub>71</sub> BM | [12]      |
| Bipy  | ¥44/25g  | 69.44 | 8.73  | J51:N2200                | [13]      |
| 2T    | ¥66/25g  | 78.60 | 18.10 | PM6:Y6                   | [14]      |
| Fc    | ¥45/100g | 76.00 | 17.40 | PM6:Y6                   | [15]      |
| TPA   | ¥39/25g  | 77.65 | 17.30 | PM6:BTP-eC9              | [16]      |
| 2-MN  | ¥30/25g  | 78.91 | 18.70 | PM6:L8-BO                | This work |

**Table S2.** Photovoltaic performance of the device with different **1-MN** ratios.

| additive          | $V_{OC}$<br>[V] | $J_{SC}$<br>[mA cm <sup>-2</sup> ] | FF<br>[%] | PCE<br>[%] |
|-------------------|-----------------|------------------------------------|-----------|------------|
| w/o               | 0.898           | 25.45                              | 75.08     | 17.15      |
| 0.15% <b>1-MN</b> | 0.895           | 26.43                              | 75.83     | 17.94      |
| 0.25% <b>1-MN</b> | 0.883           | 26.82                              | 77.22     | 18.29      |
| 0.50% <b>1-MN</b> | 0.877           | 26.63                              | 75.41     | 17.61      |
| 0.75% <b>1-MN</b> | 0.871           | 15.55                              | 66.91     | 9.06       |

**Table S3.** Photovoltaic performance of the device with different **2-MN** ratios.

| PM6:L8-BO:2-MN | $V_{oc}$<br>[V] | $J_{sc}$<br>[mA cm <sup>-2</sup> ] | FF<br>[%] | PCE<br>[%] |
|----------------|-----------------|------------------------------------|-----------|------------|
| w/o            | 0.898           | 25.45                              | 75.08     | 17.15      |
| 1:1.2:0.4      | 0.896           | 25.36                              | 76.97     | 17.50      |
| 1:1.2:0.8      | 0.890           | 26.61                              | 78.91     | 18.70      |
| 1:1.2:1.2      | 0.862           | 26.87                              | 77.76     | 18.01      |
| 1:1.2:1.6      | 0.834           | 23.95                              | 71.08     | 14.20      |

**Table S4.** Photovoltaic performance of the device with different 2,7-MN ratios.

| PM6:L8-BO:2,7-MN | $V_{oc}$<br>[V] | $J_{sc}$<br>[mA cm <sup>-2</sup> ] | FF<br>[%] | PCE<br>[%] |
|------------------|-----------------|------------------------------------|-----------|------------|
| w/o              | 0.898           | 25.45                              | 75.08     | 17.15      |
| 1:1.2:0.3        | 0.893           | 25.53                              | 75.62     | 17.24      |
| 1:1.2:0.5        | 0.882           | 26.09                              | 76.20     | 17.55      |
| 1:1.2:0.8        | 0.853           | 26.03                              | 72.50     | 16.09      |

**Table S5.** The FF and PCE of some previously reported binary PSCs treated with non-halogenated solid additives.

| Additives                  | FF[%] | PCE [%] | System                      | Ref. |
|----------------------------|-------|---------|-----------------------------|------|
| DOB                        | 75.60 | 17.05   | PM6:L8-BO                   | [10] |
| DSB                        | 73.90 | 15.59   | PM6:L8-BO                   | [10] |
| IDT(BDT-IC) <sub>2</sub>   | 71.24 | 16.34   | PM6:Y6                      | [17] |
| 2T                         | 78.60 | 18.10   | PM6:Y6                      | [14] |
| 4T                         | 76.80 | 17.20   | PM6:Y6                      | [14] |
| 9-FL                       | 79.00 | 18.60   | PM6:BTP-eC9                 | [7]  |
| TOHA                       | 76.20 | 17.91   | D18-Cl:N3                   | [18] |
| BDT                        | 77.11 | 17.91   | PM6:Y6                      | [4]  |
| ROPD                       | 66.45 | 8.33    | PTB7-Th:PC <sub>71</sub> BM | [19] |
| DDO                        | 70.09 | 10.10   | BTR:PC <sub>71</sub> BM     | [20] |
| 2-HM                       | 79.40 | 18.85   | PM6:L8-BO                   | [21] |
| 2-MN(2-methoxynaphthalene) | 76.40 | 17.32   | PM6:PY-DT                   | [2]  |
| TTA                        | 73.46 | 15.80   | PM6:BTP-eC9                 | [16] |
| TPA                        | 77.65 | 17.30   | PM6:BTP-eC9                 | [16] |
| DTB                        | 70.50 | 14.50   | PBDB-T:BO4Cl                | [22] |
| Ph                         | 77.82 | 18.47   | D18-Cl:N3                   | [5]  |
| DBT                        | 79.33 | 18.87   | PM6:L8-BO                   | [6]  |
| NA                         | 78.42 | 16.52   | PM6:Y6                      | [1]  |



|         |       |       |                            |           |
|---------|-------|-------|----------------------------|-----------|
| NDT     | 78.10 | 18.85 | PM6:L8-BO                  | [23]      |
| ADT     | 68.10 | 14.75 | PM6:Y6                     | [23]      |
| BTO     | 79.00 | 19.05 | PM6:L8-BO                  | [24]      |
| TT      | 75.10 | 17.75 | PM6:Y6                     | [8]       |
| SA-1    | 75.00 | 13.70 | PBDB-TCI:IT-4F             | [25]      |
| SA-2    | 75.00 | 13.30 | PBDB-TF:IT-4F              | [25]      |
| SA-3    | 75.00 | 13.20 | PBDB-TF:IT-4F              | [25]      |
| SA-4    | 74.80 | 13.50 | PBDB-TCI:IT-4F             | [26]      |
| SA-7    | 70.50 | 12.10 | PBDB-TCI:IT-4F             | [26]      |
| SA-8    | 56.00 | 9.30  | PBDB-TF:IT-4F              | [25]      |
| DTT-1   | 73.71 | 16.72 | PM6:L15                    | [9]       |
| DTT-2   | 77.26 | 18.72 | PM6:L15                    | [9]       |
| DTT-3   | 73.60 | 14.82 | PM6:L15                    | [9]       |
| Au:NCNT | 71.78 | 9.45  | PTB7:PC <sub>70</sub> BM   | [27]      |
| Au:BCNT | 72.09 | 9.81  | PTB7:PC <sub>70</sub> BM   | [27]      |
| GO-TPP  | 62.1  | 8.58  | PTB7:PC <sub>71</sub> BM   | [28]      |
| GO-TPP  | 58.4  | 6.92  | PCDTBT:PC <sub>71</sub> BM | [28]      |
| N-GCD   | 71    | 8.6   | PTB7:PC <sub>71</sub> BM   | [29]      |
| BPQD    | 67.2  | 8.71  | PTB7:PC <sub>71</sub> BM   | [30]      |
| BPO     | 70.7  | 8.03  | PTB7:PC <sub>71</sub> BM   | [12]      |
| 2,3-DHP | 67    | 4.44  | P3HT:PC <sub>61</sub> BM   | [31]      |
| 2,3-DHP | 66    | 5.06  | P3HT:IC <sub>60</sub> BA   | [32]      |
| 2-DHP   | 64    | 4.22  | P3HT:PC <sub>61</sub> BM   | [33]      |
| 2,4-DHP | 61    | 3.47  | P3HT:PC <sub>61</sub> BM   | [33]      |
| FCA     | 72.65 | 12.31 | PBDB-T:IT-M                | [34]      |
| BP-BP   | 70.28 | 12.41 | PBDB-T:ITIC                | [35]      |
| Fc      | 76    | 17.40 | PM6:Y6                     | [15]      |
| Bipy    | 69.44 | 8.73  | J51:N2200                  | [13]      |
| PID     | 74    | 15.9  | PM6:Y6                     | [36]      |
| M1      | 79.5  | 17.57 | DAPor:6TIC                 | [37]      |
| M2      | 77.1  | 16.70 | DAPor:6TIC                 | [37]      |
| 2-MN    | 78.91 | 18.70 | PM6:L8-BO                  | This work |

**Table S6.** Relevant parameters obtained from the  $J_{ph}$ - $V_{eff}$  Curve.

| Additives     | $J_{sat}$<br>[mA cm <sup>-2</sup> ] | $J_{ph}$<br>[mA cm <sup>-2</sup> ] | $J_{max}$<br>[mA cm <sup>-2</sup> ] | $J_{ph}/J_{sat}$ | $J_{max}/J_{sat}$ |
|---------------|-------------------------------------|------------------------------------|-------------------------------------|------------------|-------------------|
| w/o           | 27.07                               | 25.88                              | 23.13                               | 95.60%           | 85.45%            |
| <b>1-MN</b>   | 27.04                               | 26.26                              | 24.19                               | 97.12%           | 89.46%            |
| <b>2-MN</b>   | 27.46                               | 27.07                              | 24.60                               | 98.58%           | 89.58%            |
| <b>2,7-MN</b> | 27.16                               | 26.20                              | 24.04                               | 96.47%           | 88.51%            |

**Table S7.** Contact angle, surface energy, and compatibility parameters for PM6 and L8-BO films under different conditions.

| Films        | Contact angle (deg) |      | $\gamma$<br>mN m <sup>-1</sup> | $\chi_{\text{donor-acceptor}}$ |
|--------------|---------------------|------|--------------------------------|--------------------------------|
|              | H <sub>2</sub> O    | Eg   |                                |                                |
| PM6          | 94.5                | 72.5 | 21.91                          | 0.20                           |
| L8-BO        | 87.7                | 63.8 | 26.29                          |                                |
| PM6+1-MN     | 98.8                | 72.3 | 25.69                          | 0.22                           |
| L8-BO+1-MN   | 91.5                | 62.5 | 30.69                          |                                |
| PM6+2-MN     | 97.5                | 69.4 | 28.18                          | 0.07                           |
| L8-BO+2-MN   | 93.4                | 68.4 | 25.39                          |                                |
| PM6+2,7-MN   | 96.6                | 71.8 | 24.17                          | 0.09                           |
| L8-BO+2,7-MN | 90.5                | 71.3 | 21.31                          |                                |

**Table S8.** The positions, *d*-spacing, FWHM, and CCL of the (010) and (100) peaks of the BHJ film with different additive treatments.

| Blend films          | Out-Of-plane<br>$\pi$ - $\pi$ stacking cell long axis (010) |                   |                    |       | In-plane<br>Unit cell long axis (100) |               |                    |       |
|----------------------|-------------------------------------------------------------|-------------------|--------------------|-------|---------------------------------------|---------------|--------------------|-------|
|                      | q                                                           | d-<br>spacin<br>g | FWHM               | CCL   | q                                     | d-<br>spacing | FWHM               | CCL   |
|                      | [Å <sup>-1</sup> ]                                          | [Å]               | [Å <sup>-1</sup> ] | [Å]   | [Å <sup>-1</sup> ]                    | [Å]           | [Å <sup>-1</sup> ] | [Å]   |
|                      |                                                             |                   |                    |       |                                       |               |                    |       |
| PM6:L8-BO            | 1.500                                                       | 4.188             | 0.307              | 20.47 | 0.283                                 | 22.175        | 0.075              | 84.34 |
| PM6:L8-BO:1-<br>MN   | 1.560                                                       | 4.027             | 0.271              | 23.16 | 0.286                                 | 21.974        | 0.074              | 84.94 |
| PM6:L8-BO:2-<br>MN   | 1.545                                                       | 4.066             | 0.271              | 23.22 | 0.285                                 | 22.063        | 0.071              | 87.95 |
| PM6:L8-<br>BO:2,7-MN | 1.517                                                       | 4.142             | 0.299              | 21.01 | 0.283                                 | 22.224        | 0.072              | 86.74 |

**Table S9.** The universality of 2-MN.

| Active layer | $V_{\text{oc}}$<br>(V) | FF<br>(%) | $J_{\text{sc}}$<br>(mA cm <sup>-2</sup> ) | PCE<br>(%) |
|--------------|------------------------|-----------|-------------------------------------------|------------|
|--------------|------------------------|-----------|-------------------------------------------|------------|

---

|                                          |       |       |       |       |
|------------------------------------------|-------|-------|-------|-------|
| PTB7-Th:PC <sub>71</sub> BM              | 0.809 | 54.22 | 16.12 | 7.07  |
| PTB7-Th:PC <sub>71</sub> BM: <b>2-MN</b> | 0.807 | 68.09 | 17.91 | 9.84  |
| PTB7-Th:IPY-T-IC                         | 0.870 | 56.70 | 13.76 | 6.80  |
| PTB7-Th:IPY-T-IC: <b>2-MN</b> [38]       | 0.830 | 55.50 | 16.51 | 7.68  |
| PM6:PTer-N25                             | 0.960 | 38.32 | 11.62 | 4.25  |
| PM6:PTer-N25: <b>2-MN</b> [39]           | 0.940 | 65.13 | 19.52 | 11.94 |

---

## References

- [1] L. Zhong, S.-H. Kang, J. Oh, S. Jung, Y. Cho, G. Park, S. Lee, S.-J. Yoon, H. Park, C. Yang, *Adv. Funct. Mater.* 2022, 32, 2201080.
- [2] J. Song, Y. Li, Y. Cai, R. Zhang, S. Wang, J. Xin, L. Han, D. Wei, W. Ma, F. Gao, Y. Sun, *Matter* 2022, 5, 4047-4059.
- [3] Y. Ding, X. Zhang, H. Feng, X. Ke, L. Meng, Y. Sun, Z. Guo, Y. Cai, C. Jiao, X. Wan, C. Li, N. Zheng, Z. Xie, Y. Chen, *ACS Appl. Mater. Interfaces*, 2020, 12, 27425-27432.
- [4] M. Dong, S. Chen, L. Hong, J. Jing, Y. Bai, Y. Liang, C. Zhu, T. Shi, W. Zhong, L. Ying, K. Zhang, F. Huang, *Nano Energy* 2024, 119, 109097.
- [5] L. Zhong, Z. Sun, S. Lee, S. Jeong, S. Jung, Y. Cho, J. Park, J. Park, S.-J. Yoon, C. Yang, *Adv. Funct. Mater.* 2023, 33, 2305450.
- [6] M. Xiao, L. Liu, Y. Meng, B. Fan, W. Su, C. Jin, L. Liao, F. Yi, C. Xu, R. Zhang, A.K.Y. Jen, W. Ma, Q. Fan, *Sci. China Chem.* 2023, 66, 1500-1510.
- [7] L. Xu, Y. Xiong, S. Li, W. Zhao, J. Zhang, C. Miao, Y. Zhang, T. Zhang, J. Wu, S. Zhang, Q. Peng, Z. Wang, L. Ye, J. Hou, J. Wang, *Adv. Funct. Mater.* 2024, 34, 2314178.
- [8] J. Chen, Y. Wang, L. Wang, F.R. Lin, C. Han, X. Ma, J. Zheng, Z. Li, J.A. Zapien, H. Gao, A.K.Y. Jen, *Small Methods* 2024, 9, 2400172.
- [9] B. Liu, W. Xu, R. Ma, J.-W. Lee, T.A. Dela Peña, W. Yang, B. Li, M. Li, J. Wu, Y. Wang, C. Zhang, J. Yang, J. Wang, S. Ning, Z. Wang, J. Li, H. Wang, G. Li, B.J. Kim, L. Niu, X. Guo, H. Sun, *Adv. Mater.* 2023, 35, 2308334.
- [10] T. Zhou, W. Jin, Y. Li, X. Xu, Y. Duan, R. Li, L. Yu, Q. Peng, *Adv. Sci.* 2024, 11, 2401405.
- [11] Z. Chen, H. Yao, J. Wang, J. Zhang, T. Zhang, Z. Li, J. Qiao, S. Xiu, X. Hao, J. Hou, *Energy Environ. Sci.* 2023, 16, 2637-2645.
- [12] P. Cheng, C. Yan, T.K. Lau, J. Mai, X. Lu, X. Zhan, *Adv. Mater.* 2016, 28, 5822-5829.
- [13] Y. Yan, Y. Liu, J. Zhang, Q. Zhang, Y. Han, *J. Mater. Chem. C* 2021, 9, 3835-

3845.

[14] W. Liang, L. Chen, Z. Wang, Z. Peng, L. Zhu, C.H. Kwok, H. Yu, W. Xiong, T. Li, Z. Zhang, Y. Wang, Y. Liao, G. Zhang, H. Hu, Y. Chen, *Adv. Energy Mater.* 2024, 2303661.

[15] L. Ye, Y. Cai, C. Li, L. Zhu, J. Xu, K. Weng, K. Zhang, M. Huang, M. Zeng, T. Li, E. Zhou, S. Tan, X. Hao, Y. Yi, F. Liu, Z. Wang, X. Zhan, Y. Sun, *Energy Environ. Sci.* 2020, 13, 5117-5125.

[16] R. Yu, R. Shi, Z. He, T. Zhang, S. Li, Q. Lv, S. Sha, C. Yang, J. Hou, Z.a. Tan, *Angew. Chem. Int. Ed.* 2023, 62, e202308367.

[17] R. Lin, H. Zhou, X. Xu, X. Ouyang, *Surfaces and Interfaces* 2024, 46, 104072.

[18] H. Kang, Y. Jing, Y. Zhang, Y. Li, H. Zhang, H. Zhou, Y. Zhang, *Solar RRL* 2023, 7, 2201084.

[19] Q. Zhang, C. Bao, S. Cui, P. Zhong, K. Zhang, W. Zhu, Y. Liu, *J. Mater. Chem. C* 2020, 8, 16551-16560.

[20] X. Du, X. Li, H. Lin, L. Zhou, C. Zheng, S. Tao, *J. Mater. Chem. A* 2019, 7, 7437-7450.

[21] X. Yang, B. Li, X. Zhang, S. Li, Q. Zhang, L. Yuan, D.-H. Ko, W. Ma, J. Yuan, *Adv. Mater.* 2023, 35, 2301604.

[22] R. Yu, H. Yao, Y. Xu, J. Li, L. Hong, T. Zhang, Y. Cui, Z. Peng, M. Gao, L. Ye, Z. Tan, J. Hou, *Adv. Funct. Mater.* 2021, 31, 2010535.

[23] W. Zhang, Y. Wu, R. Ma, H. Fan, X. Li, H. Yang, C. Cui, Y. Li, *Angew. Chem. Int. Ed.* 2023, 62, e202309713.

[24] M. Xiao, Y. Meng, L. Tang, P. Li, L. Tang, W. Zhang, B. Hu, F. Yi, T. Jia, J. Cao, C. Xu, G. Lu, X. Hao, W. Ma, Q. Fan, *Adv. Funct. Mater.* 2024, 34, 2311216.

[25] R. Yu, H. Yao, L. Hong, Y. Qin, J. Zhu, Y. Cui, S. Li, J. Hou, *Nat. Commun.* 2018, 9, 4645.

[26] R. Yu, H. Yao, Z. Chen, J. Xin, L. Hong, Y. Xu, Y. Zu, W. Ma, J. Hou, *Adv. Mater.* 2019, 31, 1900477.

[27] J.M. Lee, J. Lim, N. Lee, H.I. Park, K.E. Lee, T. Jeon, S.A. Nam, J. Kim, J. Shin, S.O. Kim, *Adv. Mater.* 2014, 27, 1519-1525.

- [28] M.M. Stylianakis, D. Konios, G. Kakavelakis, G. Charalambidis, E. Stratakis, A.G. Coutsolelos, E. Kymakis, S.H. Anastasiadis, *Nanoscale* 2015, 7, 17827-17835.
- [29] B.J. Moon, Y. Oh, D.H. Shin, S.J. Kim, S.H. Lee, T.-W. Kim, M. Park, S. Bae, *Chem. Mater.* 2016, 28, 1481-1488.
- [30] S. Liu, S. Lin, P. You, C. Surya, S.P. Lau, F. Yan, *Angew. Chem. Int. Ed.* 2017, 56, 13717-13721.
- [31] C.-G. Wu, C.-H. Chiang, H.-C. Han, *J. Mater. Chem. A* 2014, 2, 5295-5303.
- [32] B. Xu, G. Sai-Anand, A.-I. Gopalan, Q. Qiao, S.-W. Kang, *Polymers*, 2018, 10, 121.
- [33] B. Xu, G. Sai-Anand, G.E. Unni, H.-M. Jeong, J.-S. Kim, S.-W. Kim, J.-B. Kwon, J.-H. Bae, S.-W. Kang, *Appl. Surface Sci.* 2019, 484, 825-834.
- [34] Q. Guo, Y. Liu, M. Liu, H. Zhang, X. Qian, J. Yang, J. Wang, W. Xue, Q. Zhao, X. Xu, W. Ma, Z. Tang, Y. Li, Z. Bo, *Adv. Mater.* 2020, 32, 2003164.
- [35] P. Fan, W. Sun, X. Zhang, Y. Wu, Q. Hu, Q. Zhang, J. Yu, T.P. Russell, *Adv. Funct. Mater.* 2021, 31, 2008699.
- [36] M. Choi, H.-S. Jeong, J. Lee, Y. Choi, I.-B. Kim, D.-Y. Kim, H. Kang, S.-Y. Jang, *J. Mater. Chem. A* 2024, 12, 8963-8971.
- [37] Y. Miao, Y. Sun, W. Zou, X. Zhang, Y. Kan, W. Zhang, X. Jiang, X. Wang, R. Yang, X. Hao, L. Geng, H. Xu, K. Gao, *Adv. Mater.* 2024, 36, 2406623.
- [38] L. Chen, M. Zeng, C. Weng, S. Tan, P. Shen, *ACS Appl. Mater. Interfaces* 2019, 11, 48134-48146.
- [39] H. Liu, L. Wang, H. Liu, M. Guan, C.-J. Su, U.S. Jeng, B. Zhao, C. Weng, K. You, X. Lu, *Chem. Eng. J.* 2022, 429, 132407.
